# Supplementary material for: Importance of the PD-1/PD-L1 Axis for Malignant Transformation and Risk Assessment of Oral Leukoplakia
Source: MDPI journal article supplement (doi:10.3390/biomedicines9020194), 2021-02-16
Supplement: s1 [file s1]

## Supplementary Material

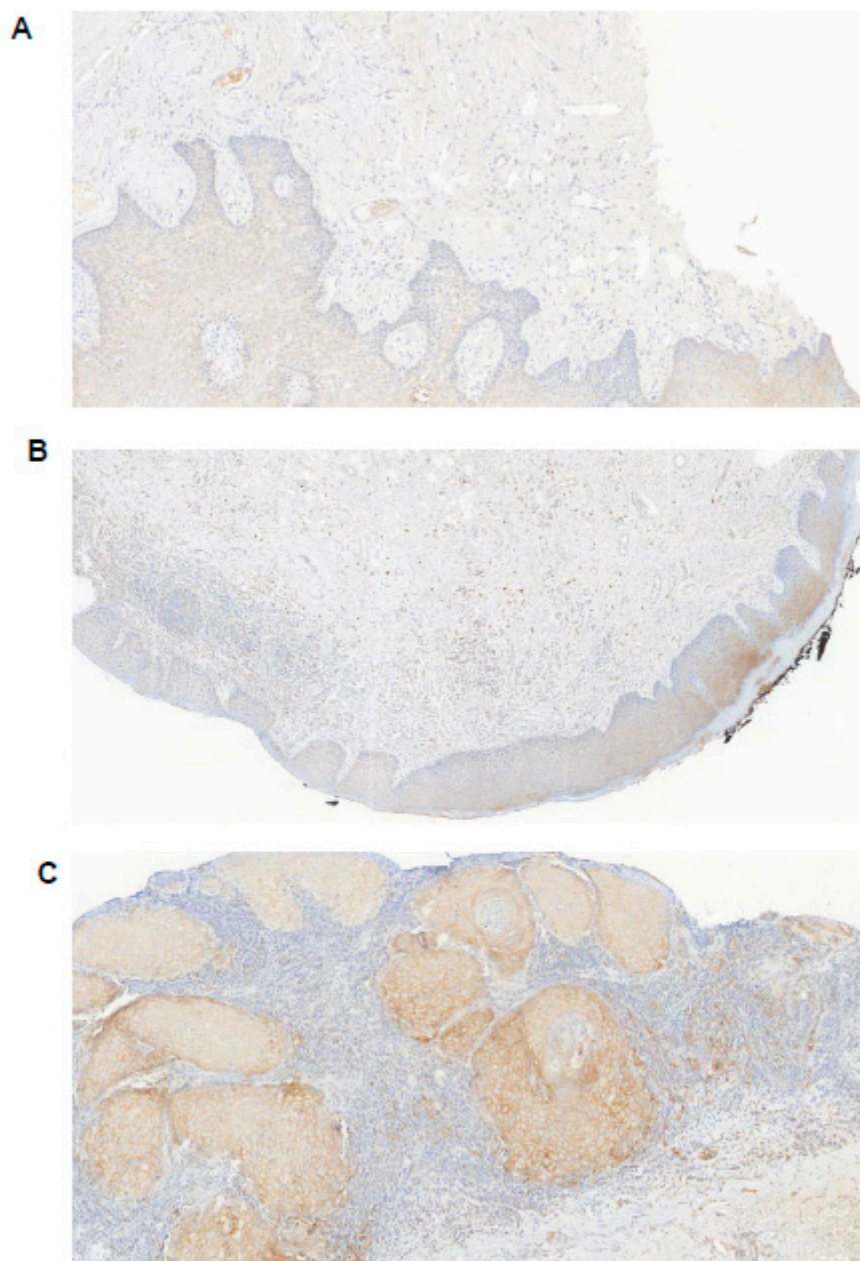

**Figure S1.** Classification "none", "mild", "moderate" and "severe" inflamed samples according to infiltration density by inflammatory cells in the subepithelium of the affected tissue (sections stained applying antibody against PD-L1). (A) mild (B) moderate (C) severe. (magnification 10×).
